# Supplementary material for: Rapid recognition of fatal cyanide in water in a wide pH range by a trifluoroacetamido based metal–organic framework
Source: Royal Society of Chemistry journal article supplement (doi:10.1039/d1nj04278e), 2021-01-01
Supplement: d1nj04278e1.pdf [file d1nj04278e1.pdf]

## Supporting Information For:

### **Rapid Recognition of Fatal Cyanide in Water in a Wide pH Range by a Trifluoroacetamido Based Metal-Organic Framework**

*Abhijeet Rana,<sup>a</sup> Chiranjib Gogoi,<sup>a</sup> Subhrajyoti Ghosh,<sup>a</sup> Soutick Nandi,<sup>ab</sup> Saurav Kumar,<sup>a</sup> Uttam Manna and Shyam Biswas<sup>\*a</sup>*

<sup>a</sup>Department of Chemistry, Indian Institute of Technology Guwahati, Guwahati, 781039 Assam, India.

<sup>b</sup>Department of Chemistry, Brainware University, Kolkata, 700125 West Bengal, India.

\* Corresponding author. Tel: +91-3612583309, Fax: +91-3612582349.

E-mail address: sbiswas@iitg.ac.in

### Materials and General Methods:

All the reagents and solvents were purchased from commercial available sources and used without further purification, except the H<sub>2</sub>BDC-NHCOCF<sub>3</sub> ligand which was prepared according to the reported procedure.<sup>1</sup> The initial reagents for the synthesis of H<sub>2</sub>BDC-NHCOCF<sub>3</sub> ligand, namely 4-aminobenzoic acid and trifluoroacetic anhydride, were purchased from Sigma Aldrich Chemical Co. and Loba Chemie Pvt. Ltd, respectively. Fourier transform infrared (FT-IR) spectra were collected in the region 400-4000 cm<sup>-1</sup> on a PerkinElmer Spectrum Two FT-IR spectrometer. The following notations were used for characterization of the bands: broad (br), strong (s), very strong (vs), medium (m) and weak (w). FE-SEM images were captured with a Zeiss (Zemini) scanning electron microscope. Thermogravimetric analyses (TGA) were performed under air atmosphere at a heating rate of 5 °C min<sup>-1</sup> in a temperature region of 25-700 °C by employing a Netzsch STA-409CD thermal analyser. Rigaku Smartlab X-ray diffractometer (model TTRAX III) was employed for powder X-ray diffraction (XRD) measurements at 50 kV, 100 mA using Cu-K $\alpha$  ( $\lambda = 1.5406 \text{ \AA}$ ) radiation. N<sub>2</sub> sorption isotherms were recorded by using Quantachrome Quadrasorb evo surface area analyser at -196 °C. Before the sorption analysis, the degassing of the compound was carried out at 100°C under high vacuum for 12 h. The contact angle measurements were performed by employing a KRUSS Drop Shape Analyzer-DSA-25 instrument with an automatic liquid dispenser at ambient temperature. Fluorescence sensing studies were performed with a HORIBA JOBIN YVON Fluoromax-4 spectrofluorometric). The DIVCOL program<sup>2</sup> incorporated within STOE's WinXPow software package<sup>3</sup> was used to determine the lattice parameters. Pawley refinement was carried out using Materials Studio software.

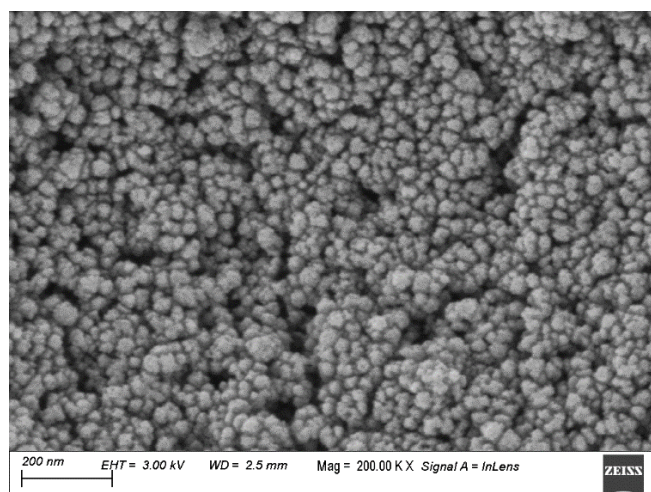

**Figure S1.** FESEM image of 1'.

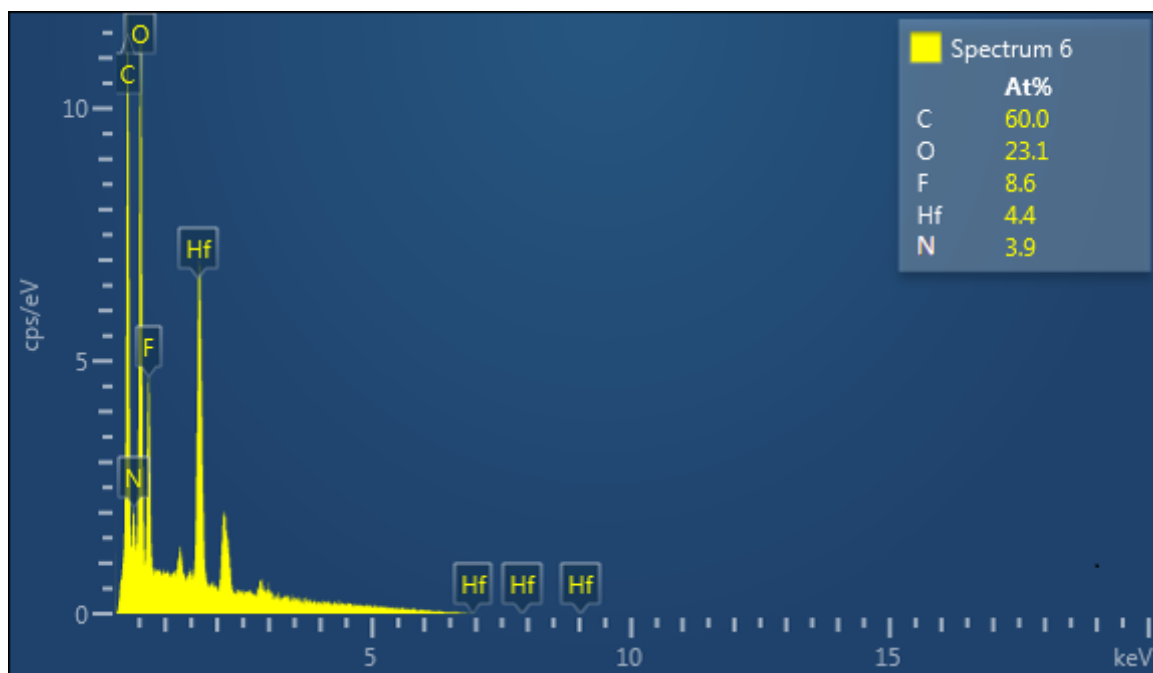

**Figure S2.** EDX spectrum of 1'.

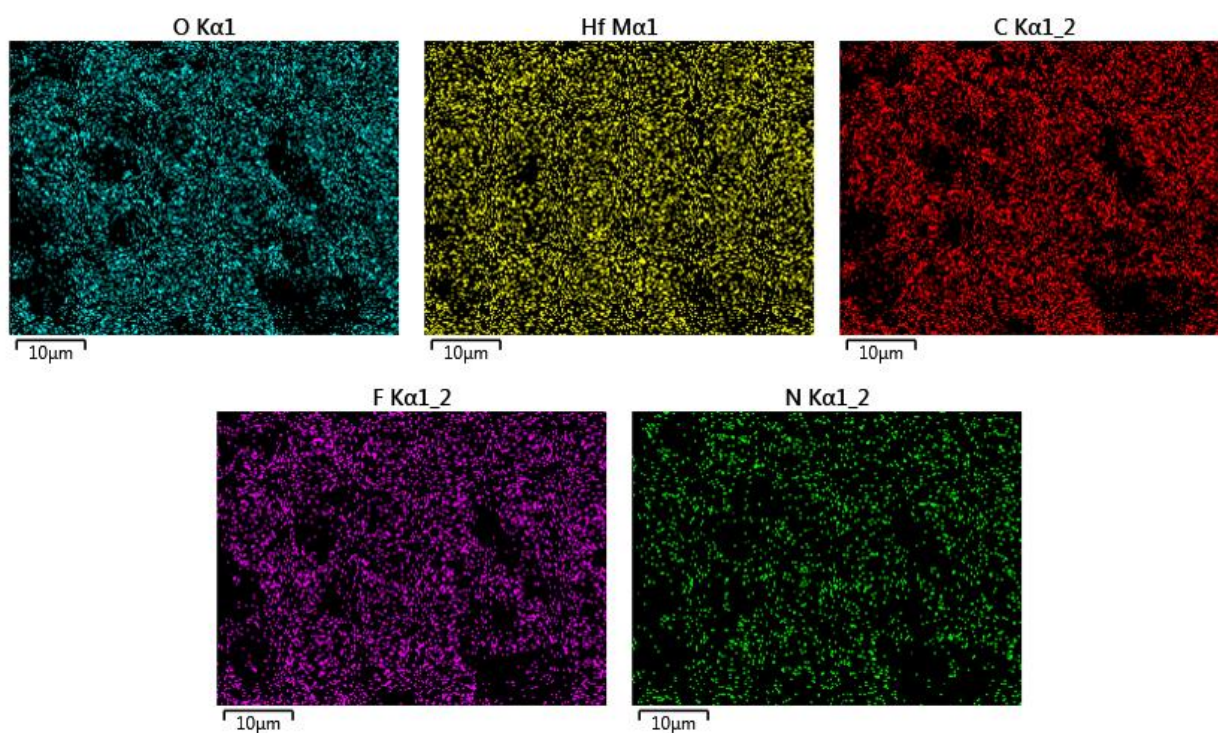

**Figure S3.** EDX elemental mapping of 1'.

**Table S1.** Unit cell parameters of **1** obtained by indexing its PXRD data collected at room temperature. The obtained values have been compared with the PXRD data of UiO-66 MOF collected at room temperature.

| Compound name                 | [Hf <sub>6</sub> O <sub>4</sub> (OH) <sub>4</sub> (BDC-NH-CO(CF <sub>3</sub> ) <sub>6</sub> ) <sub>6</sub> ] <sub>4</sub> ·4H <sub>2</sub> O·5DMF ( <b>1</b> )<br>(this work) | UiO-66 (reported) <sup>4</sup>     |
|-------------------------------|-------------------------------------------------------------------------------------------------------------------------------------------------------------------------------|------------------------------------|
| Space Group                   | <i>Fm</i> $\bar{3}$ <i>m</i> (225)                                                                                                                                            | <i>Fm</i> $\bar{3}$ <i>m</i> (225) |
| Crystal System                | Cubic                                                                                                                                                                         | Cubic                              |
| a = b = c (Å)                 | 20.748 (3)                                                                                                                                                                    | 20.700 (2)                         |
| $\alpha = \beta = \gamma$ (°) | 90                                                                                                                                                                            | 90                                 |
| V (Å <sup>3</sup> )           | 8931.0 (19)                                                                                                                                                                   | 8870.3 (2)                         |
| Radiation                     | Cu K $\alpha$ 1                                                                                                                                                               | Cu K $\alpha$ 1                    |
| Figure of Merit (FOM)         | 39.4                                                                                                                                                                          | -                                  |

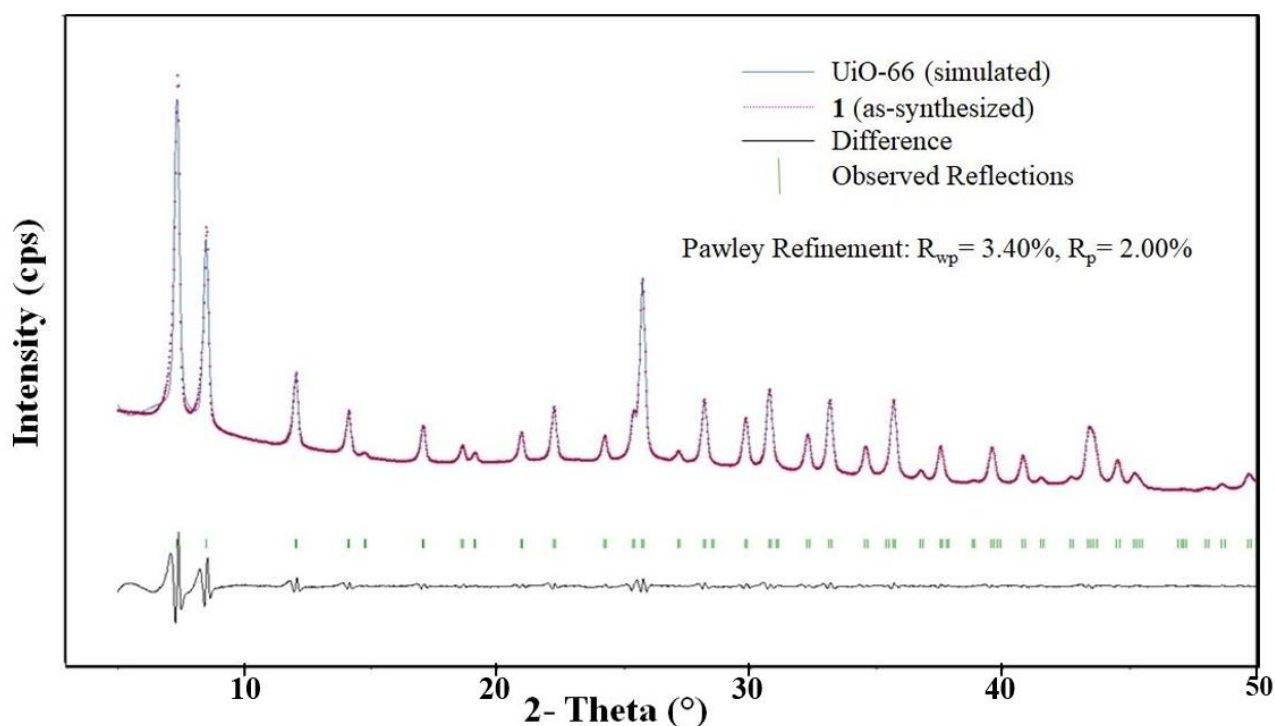

**Figure S4.** Pawley fit for the XRPD pattern of as-synthesized **1**. Blue lines and red dots denote simulated and observed patterns, respectively. The peak positions and difference plot are displayed at middle ( $R_p = 2.00$ ,  $R_{wp} = 3.40$ ).

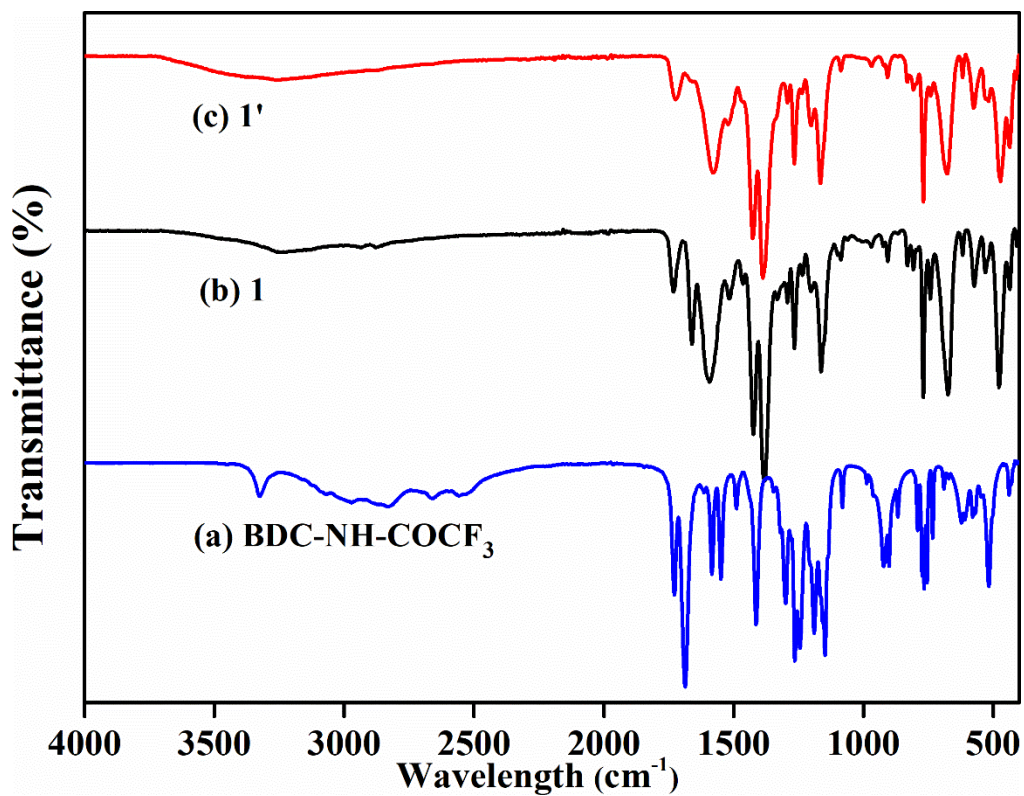

**Figure S5.** FT-IR spectra of (a)  $\text{H}_2\text{BDC-NH-COCF}_3$  ligand (blue), (b) as-synthesized **1** (black) and (c) activated **1'** (red).

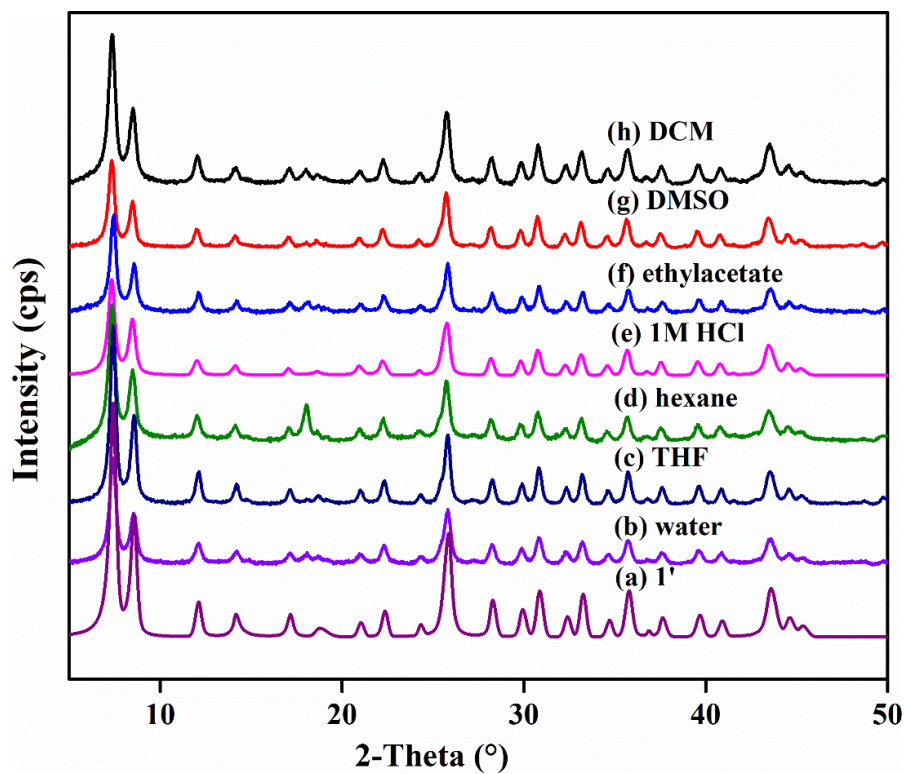

**Figure S6.** PXRD patterns of **1'** showing its chemical stability in (b) water, (c) THF, (d) hexane, (e) HCl (1M), (f) ethyl acetate, (g) DMSO and (h) DCM.

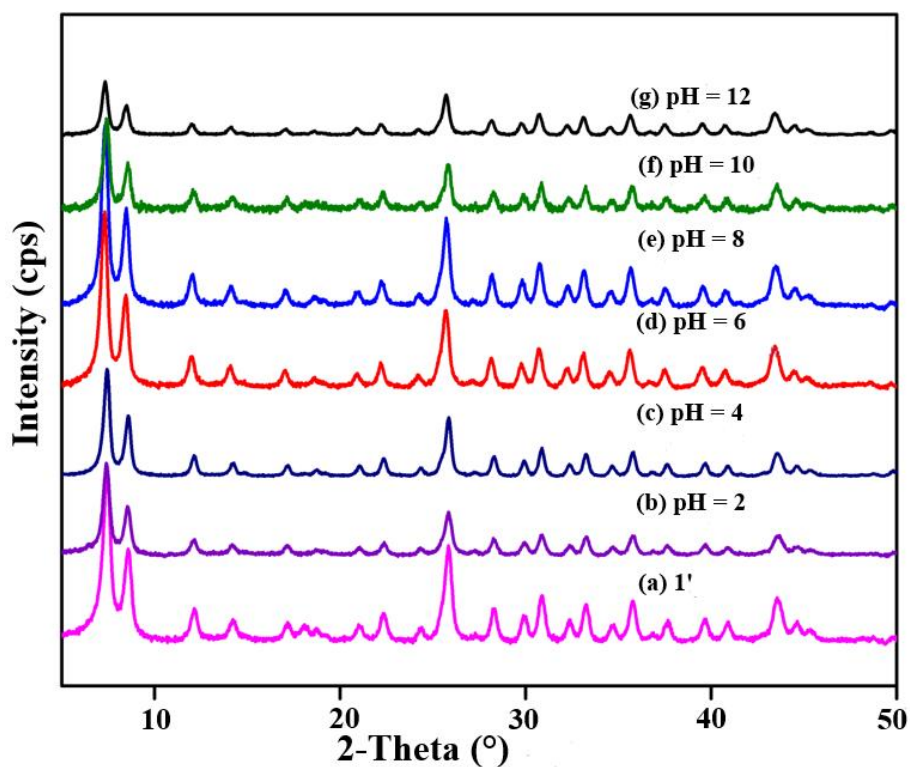

**Figure S7.** PXRD patterns of **1'** showing its chemical stability in different pH media.

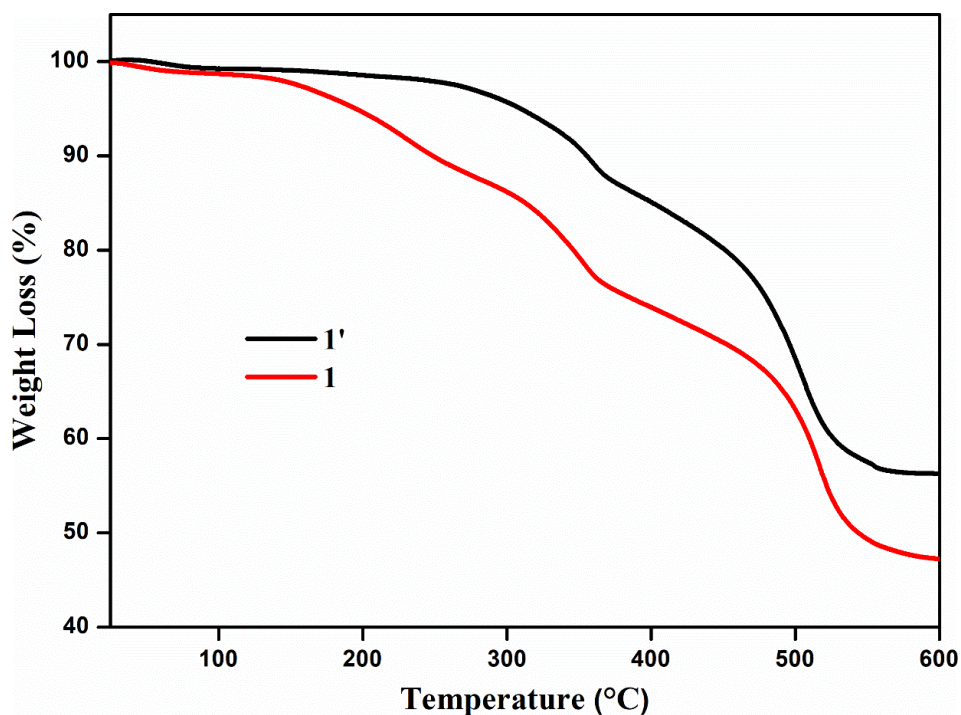

**Figure S8.** TGA curves of as-synthesized **1** (red) and activated **1'** (black) recorded in an air atmosphere in the temperature range of 25-600 °C at a heating rate of 5 °C min<sup>-1</sup>.

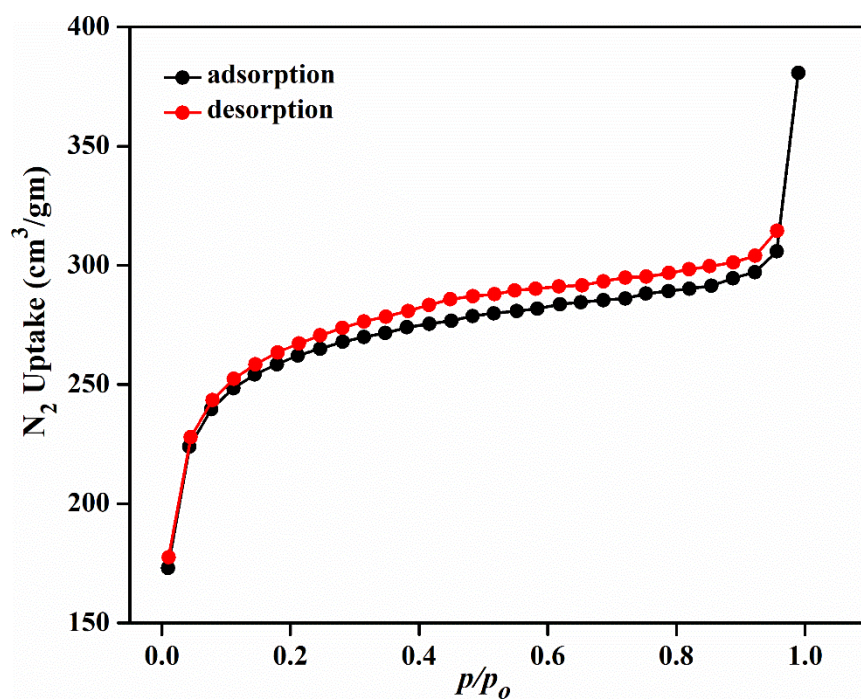

**Figure S9.** N<sub>2</sub> adsorption (black circles) and desorption (red circles) isotherms of thermally activated **1'** recorded at  $-196\text{ }^{\circ}\text{C}$ .

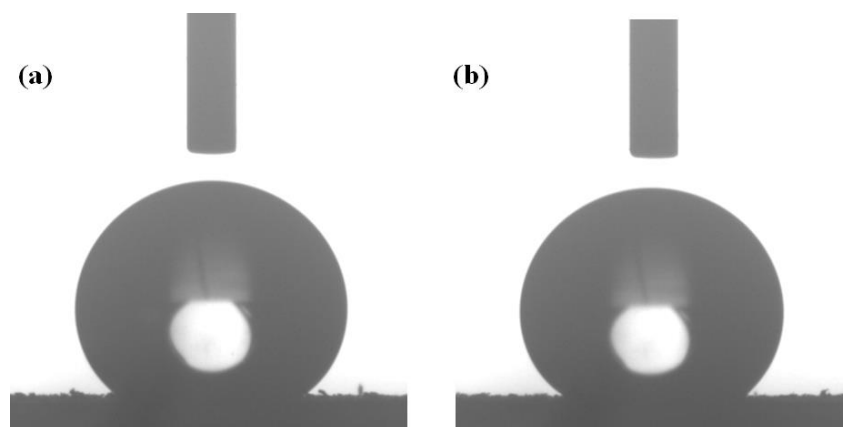

**Figure S10.** The contact angle images of beaded water droplets on the surface of (a) **1** and (b) **1'**.

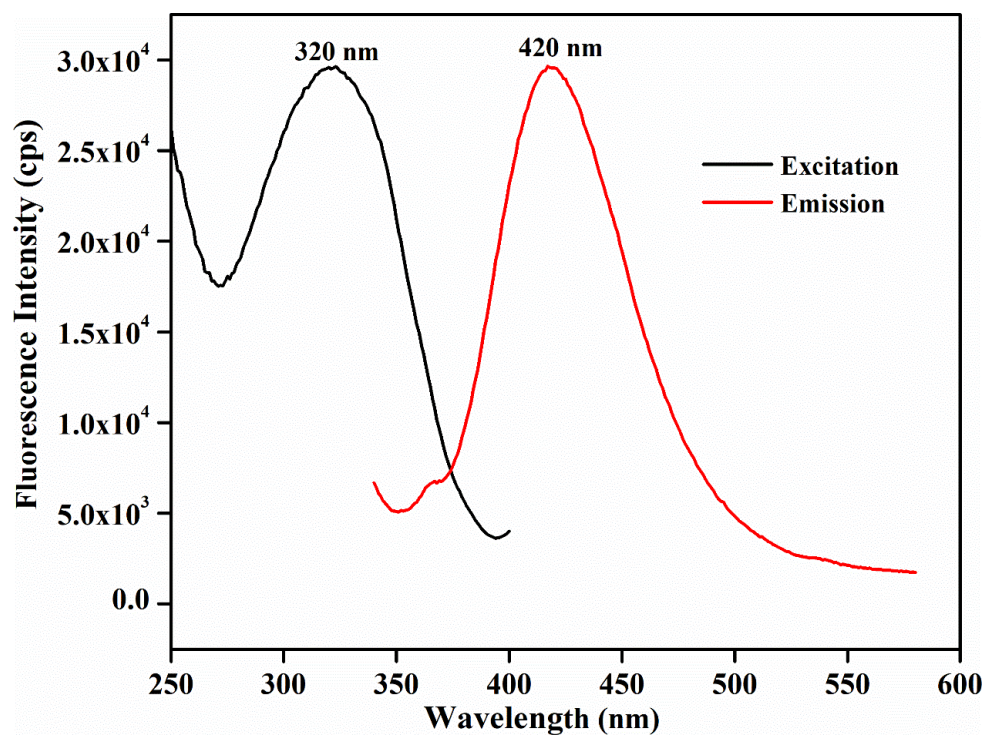

**Figure S11.** Fluorescence excitation (black) and emission (red) spectra of **1'**.

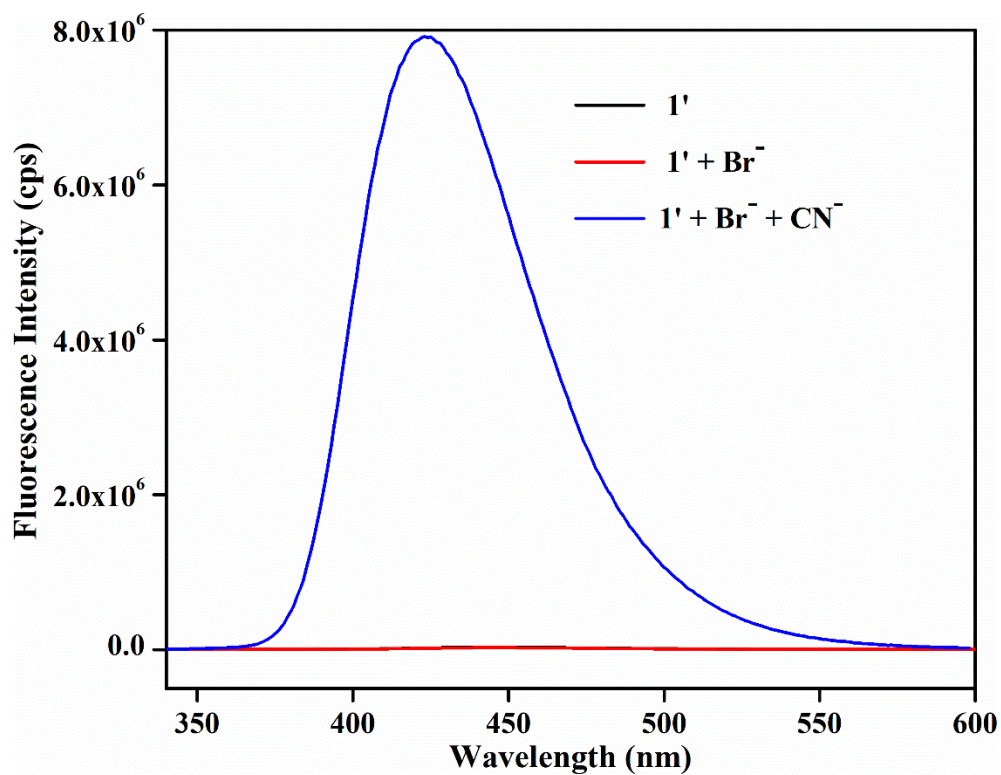

**Figure S12.** Fluorescence intensity of **1'** dispersed in water after addition of 10 mM solution of NaCN in water (300  $\mu$ L) in presence of 10 mM solution of NaBr in water (300  $\mu$ L).



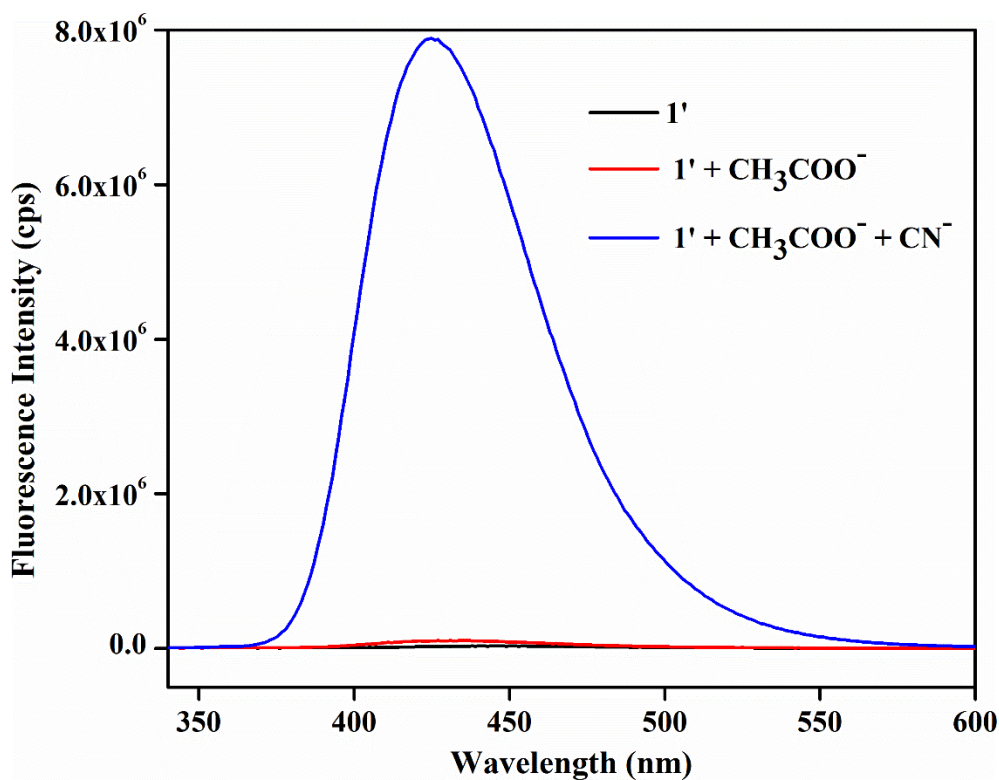

**Figure S13.** Fluorescence intensity of **1'** dispersed in water after addition of 10 mM solution of NaCN in water (300  $\mu$ L) in presence of 10 mM solution of CH<sub>3</sub>COONa in water (300  $\mu$ L).

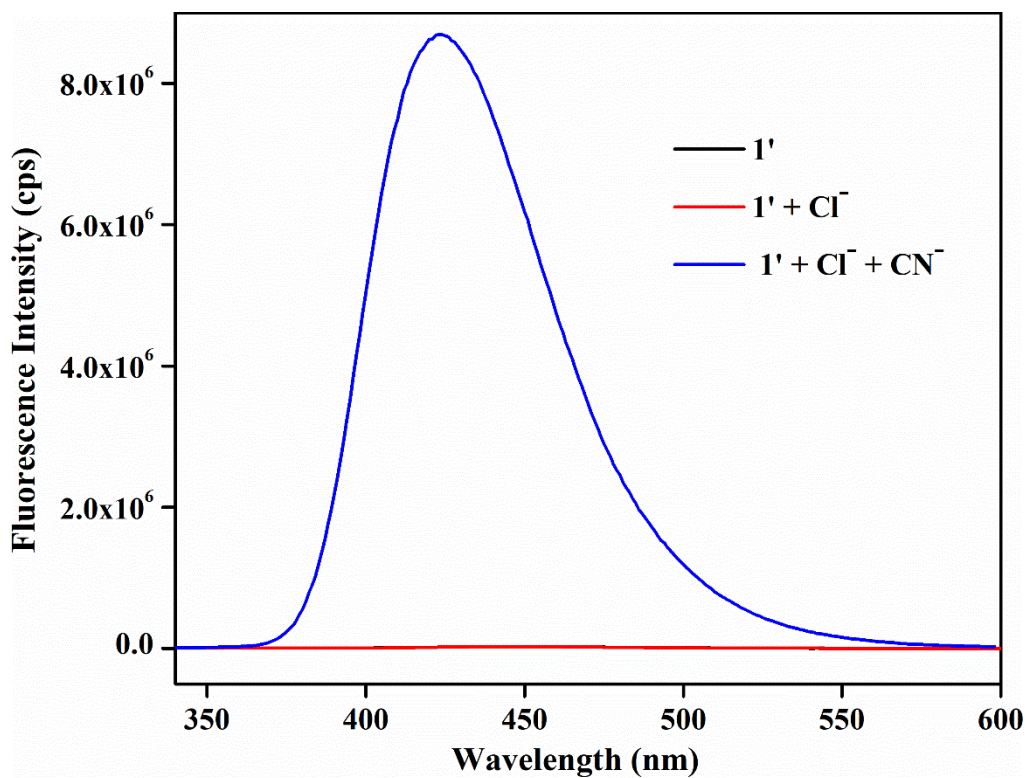

**Figure S14.** Fluorescence intensity of **1'** dispersed in water after addition of 10 mM solution of NaCN in water (300  $\mu$ L) in presence of 10 mM solution of NaCl in water (300  $\mu$ L).

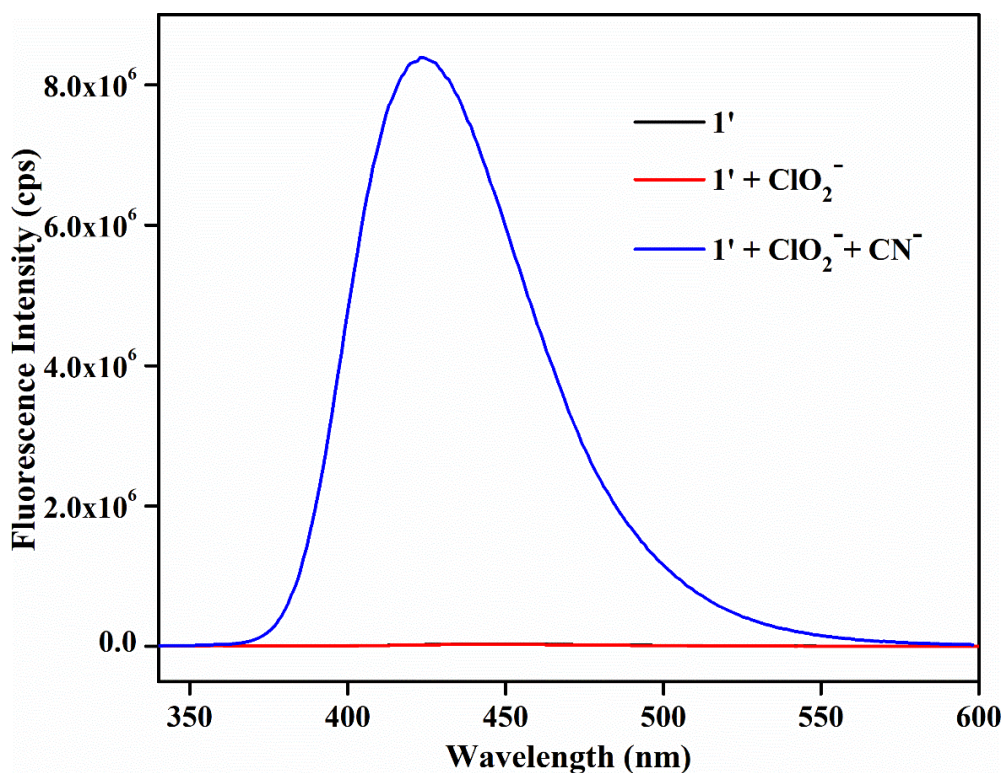

**Figure S15.** Fluorescence intensity of **1'** dispersed in water after addition of 10 mM solution of NaCN in water (300  $\mu$ L) in presence of 10 mM solution of NaClO<sub>2</sub> in water (300  $\mu$ L).

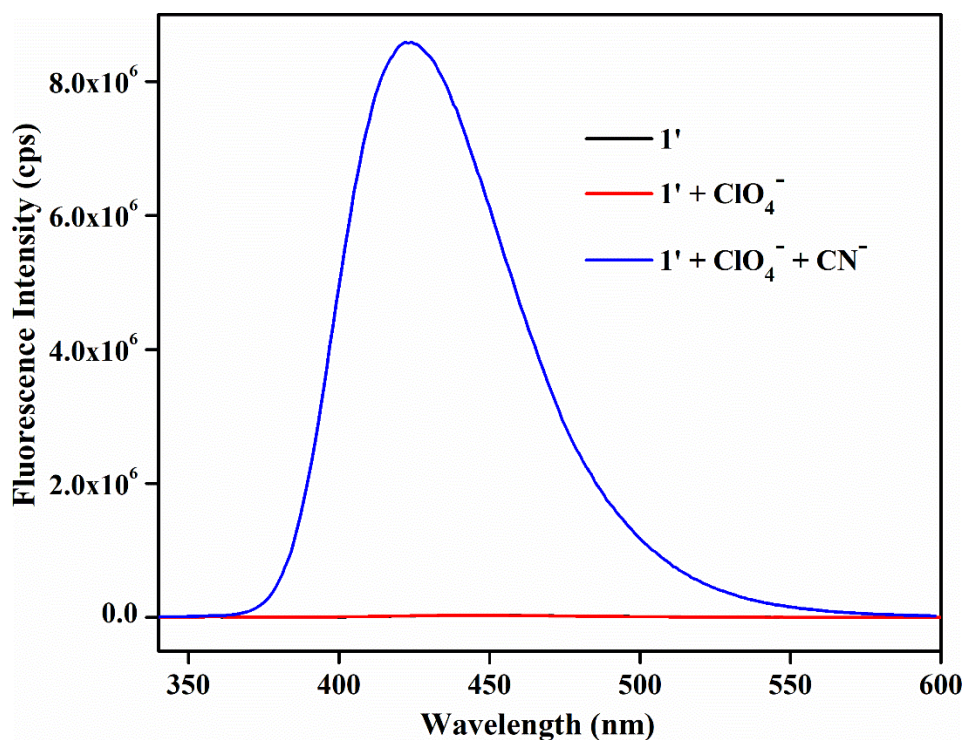

**Figure S16.** Fluorescence intensity of **1'** dispersed in water after addition of 10 mM solution of NaCN in water (300  $\mu$ L) in presence of 10 mM solution of NaClO<sub>4</sub> in water (300  $\mu$ L).

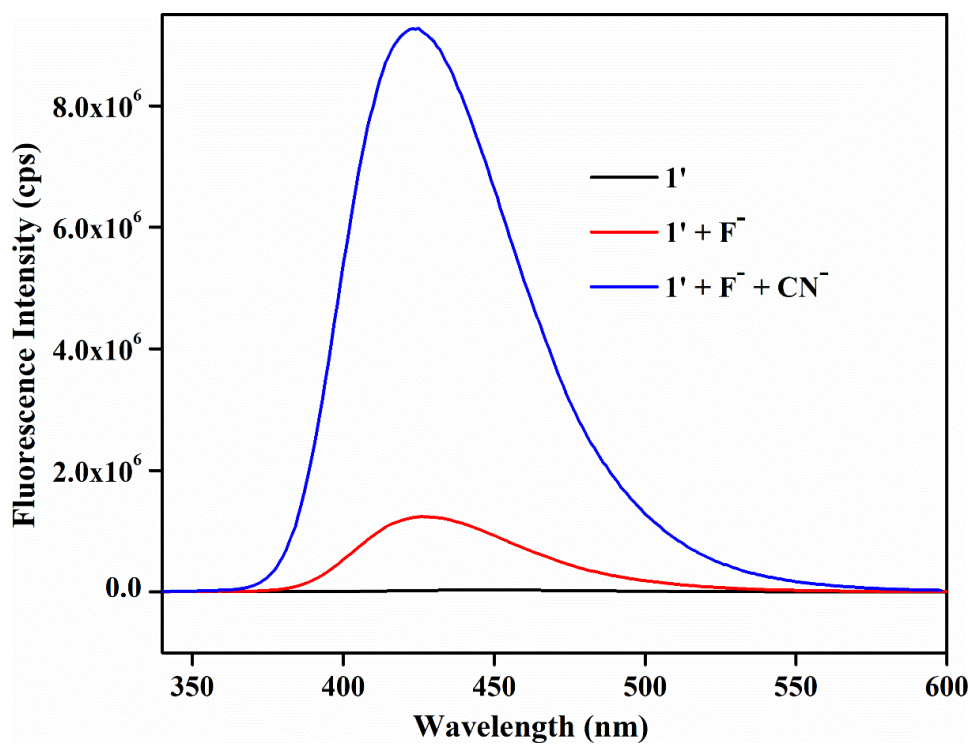

**Figure S17.** Fluorescence intensity of **1'** dispersed in water after addition of 10 mM solution of NaCN in water (300  $\mu$ L) in presence of 10 mM solution of NaF in water (300  $\mu$ L).

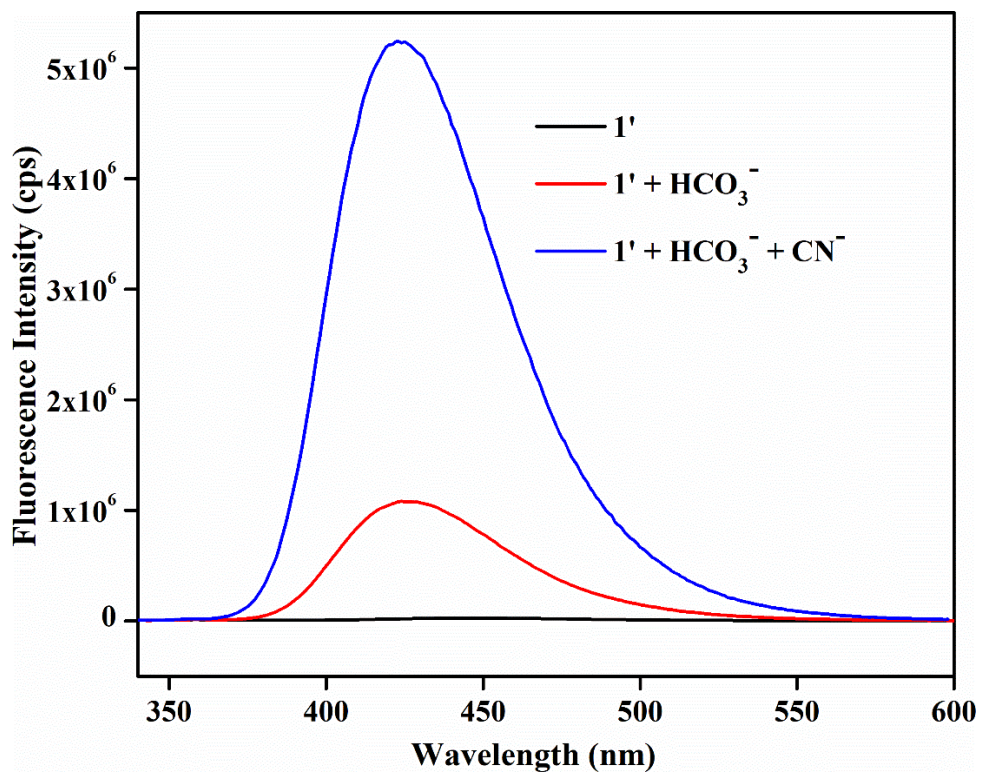

**Figure S18.** Fluorescence intensity of **1'** dispersed in water after addition of 10 mM solution of NaCN in water (300  $\mu$ L) in presence of 10 mM solution of NaHCO<sub>3</sub> in water (300  $\mu$ L).

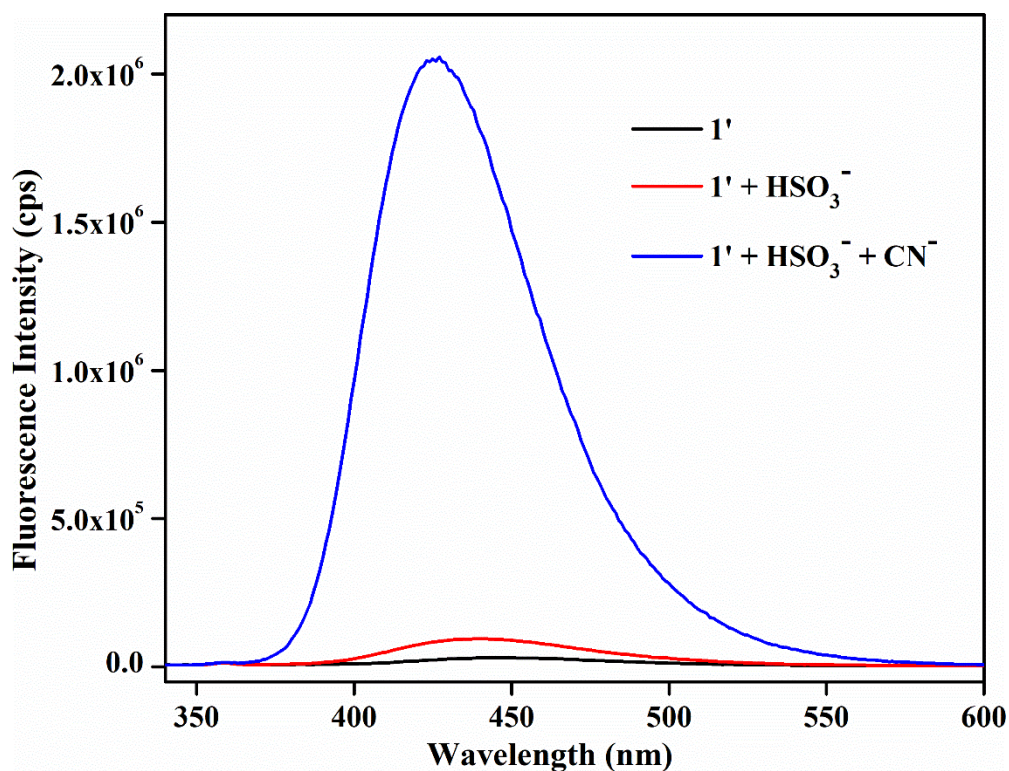

**Figure S19.** Fluorescence intensity of **1'** dispersed in water after addition of 10 mM solution of NaCN in water (300  $\mu$ L) in presence of 10 mM solution of NaHSO<sub>3</sub> in water (300  $\mu$ L).

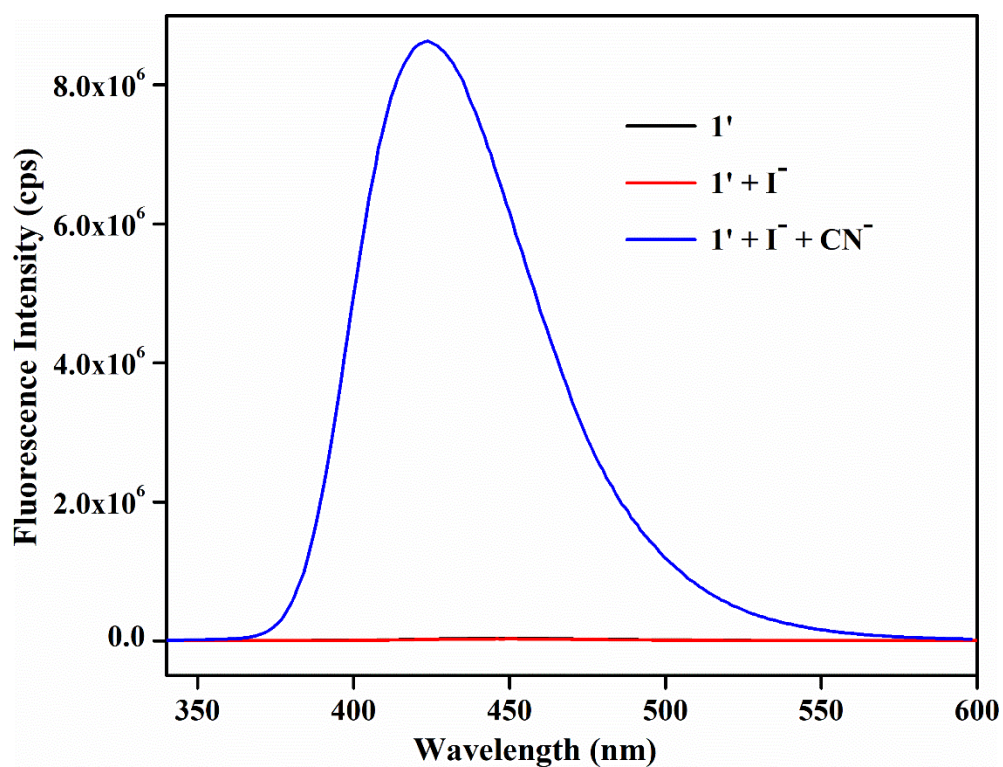

**Figure S20.** Fluorescence intensity of **1'** dispersed in water after addition of 10 mM solution of NaCN in water (300  $\mu$ L) in presence of 10 mM solution of NaI in water (300  $\mu$ L).

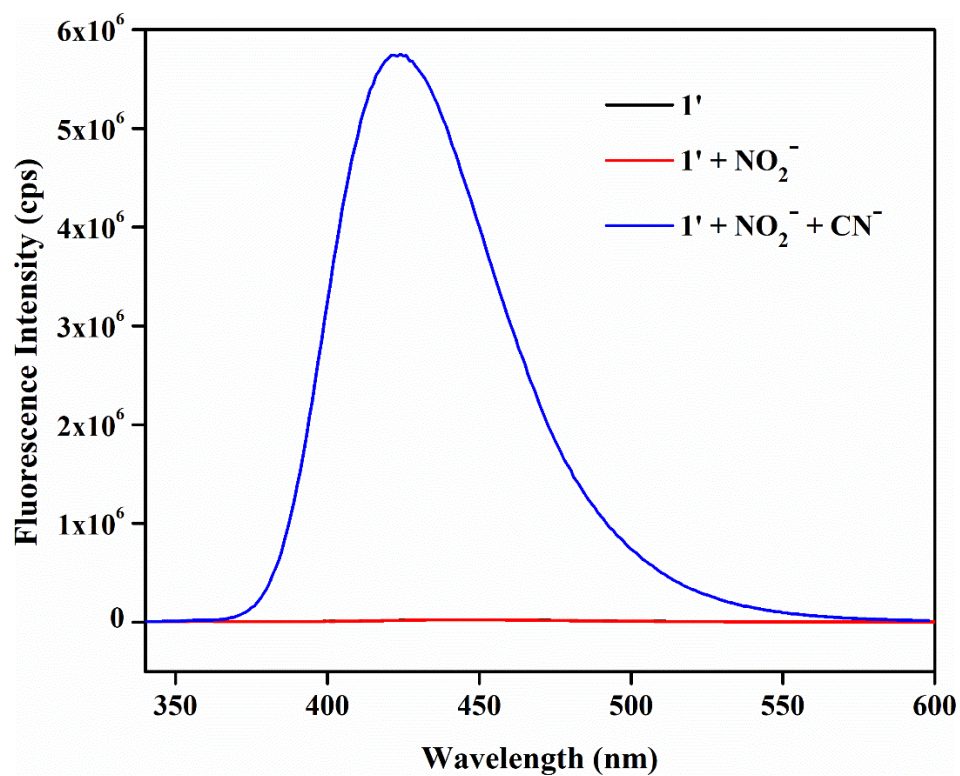

**Figure S21.** Fluorescence intensity of **1'** dispersed in water after addition of 10 mM solution of NaCN in water (300  $\mu$ L) in presence of 10 mM solution of NaNO<sub>2</sub> in water (300  $\mu$ L).

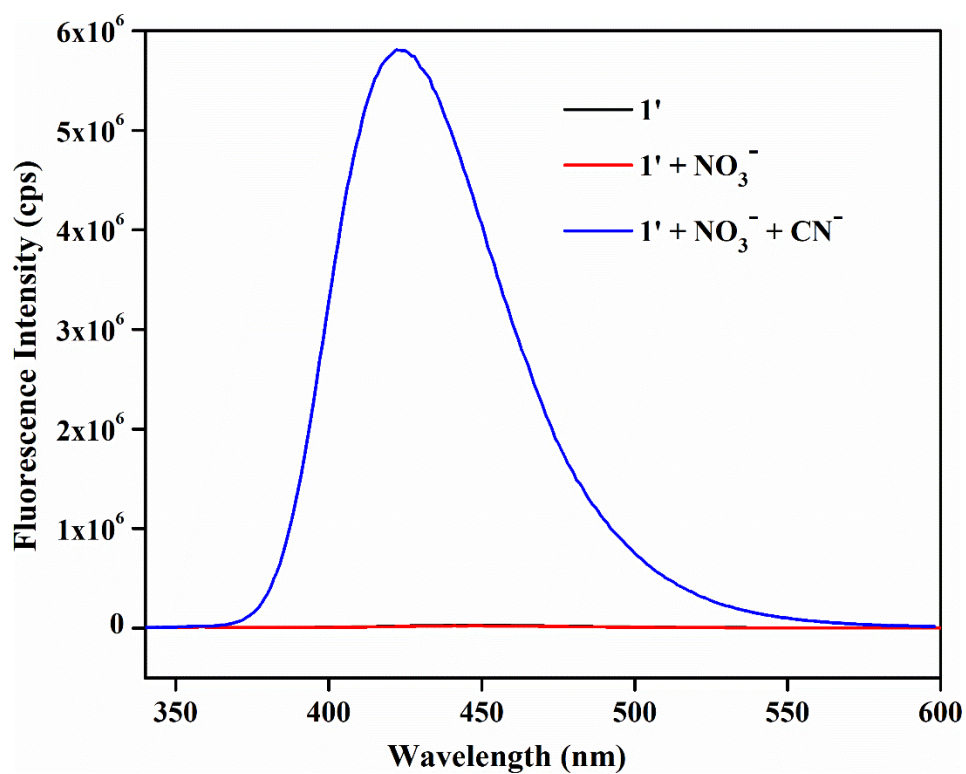

**Figure S22.** Fluorescence intensity of **1'** dispersed in water after addition of 10 mM solution of NaCN in water (300  $\mu$ L) in presence of 10 mM solution of NaNO<sub>3</sub> in water (300  $\mu$ L).

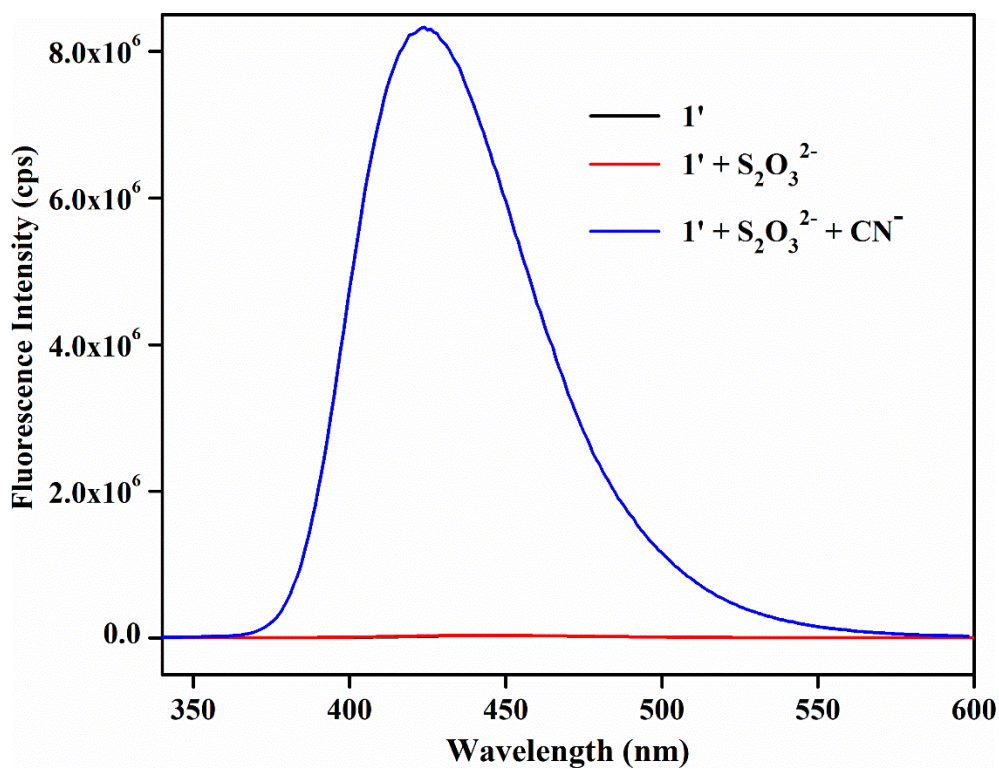

**Figure S23.** Fluorescence intensity of **1'** dispersed in water after addition of 10 mM solution of NaCN in water (300  $\mu$ L) in presence of 10 mM solution of Na<sub>2</sub>S<sub>2</sub>O<sub>3</sub> in water (300  $\mu$ L).

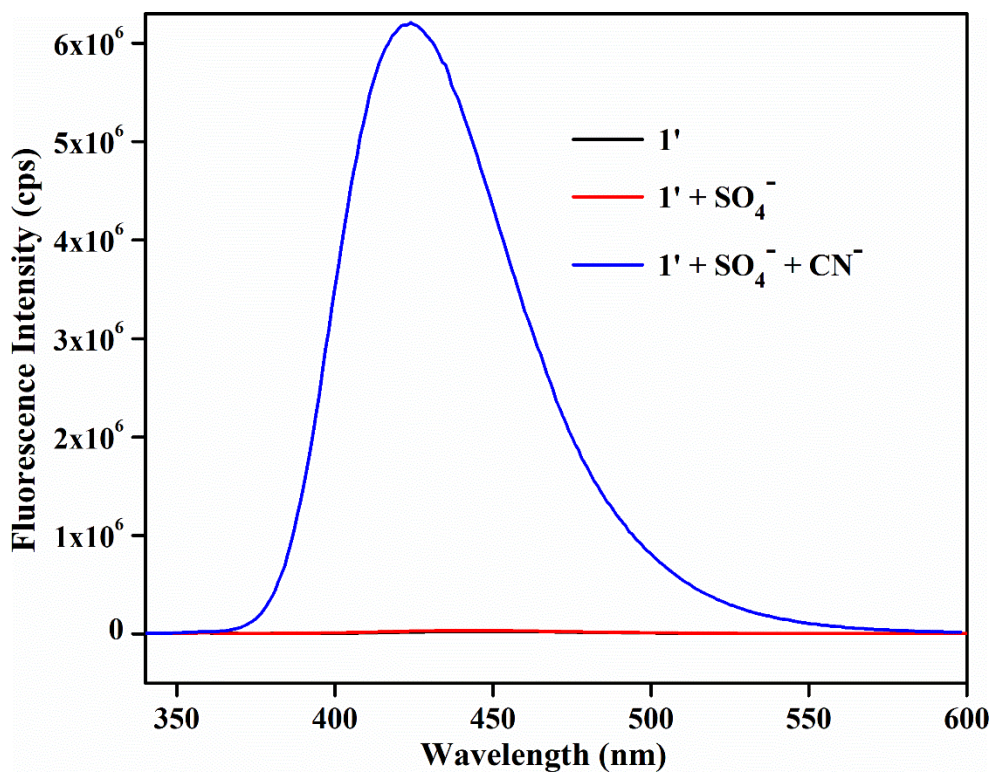

**Figure S24.** Fluorescence intensity of **1'** dispersed in water after addition of 10 mM solution of NaCN in water (300  $\mu$ L) in presence of 10 mM solution of Na<sub>2</sub>SO<sub>4</sub> in water (300  $\mu$ L).

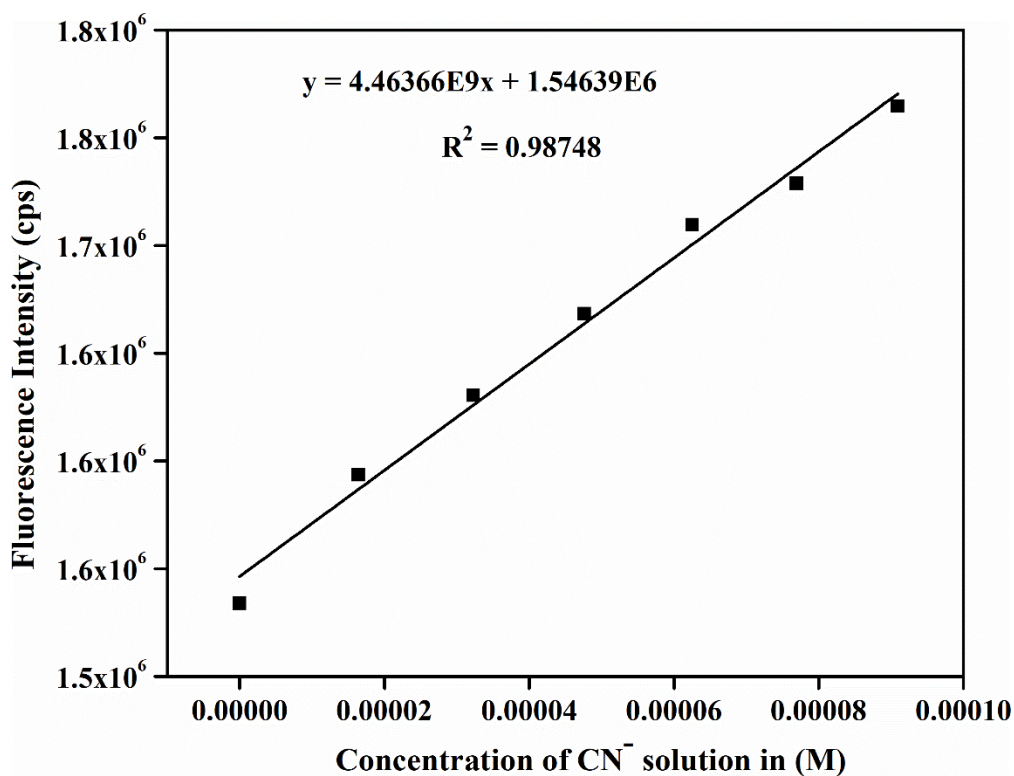

**Figure S25.** Change in the fluorescence intensity of **1'** as a function of CN<sup>-</sup> concentration.

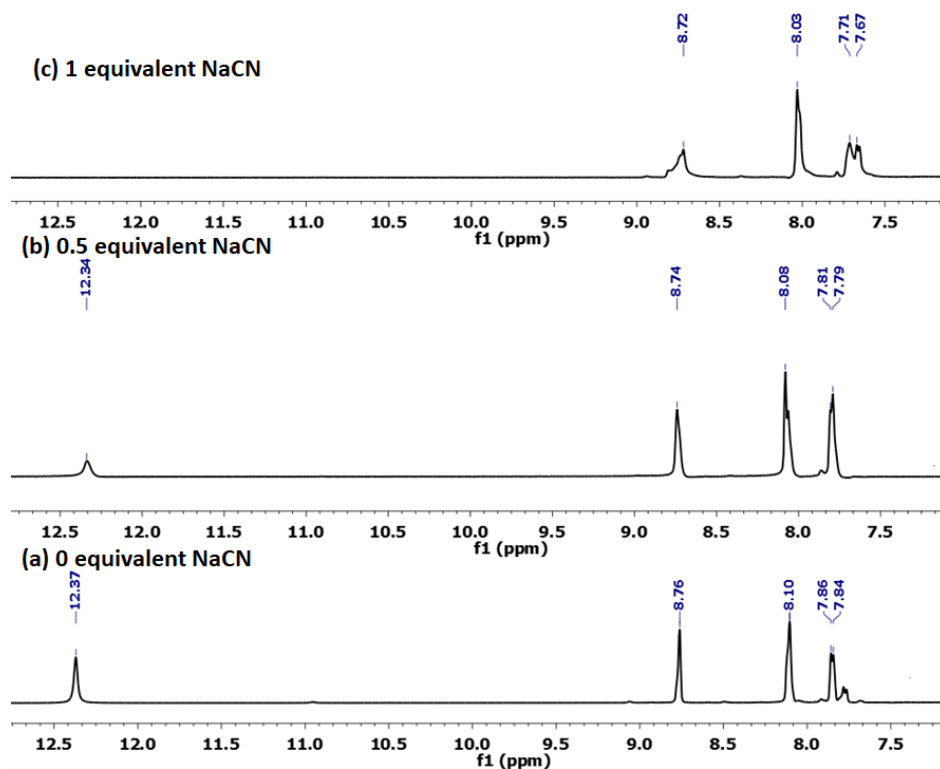

**Figure S26.** Extended view of stacked <sup>1</sup>H NMR spectra of NaCN-treated **1'** after digestion in DMSO-d<sub>6</sub>/HF. (a) **1'** (digested in DMSO-d<sub>6</sub>/HF), (b) 0.5 equivalent NaCN-treated (dissolved

in D<sub>2</sub>O) **1'** (digested in DMSO-d<sub>6</sub>/HF), (C) 1 equivalent NaCN-treated (dissolved in D<sub>2</sub>O) **1'** (digested in DMSO-d<sub>6</sub>/HF). With incremental treatment of NaCN the intensity of peak at 12.37 ppm for –NH proton decreased and shifted to up-field. The other peaks at aromatic region also shifted to up-field region which supports the deprotonation mechanism of –NH group.

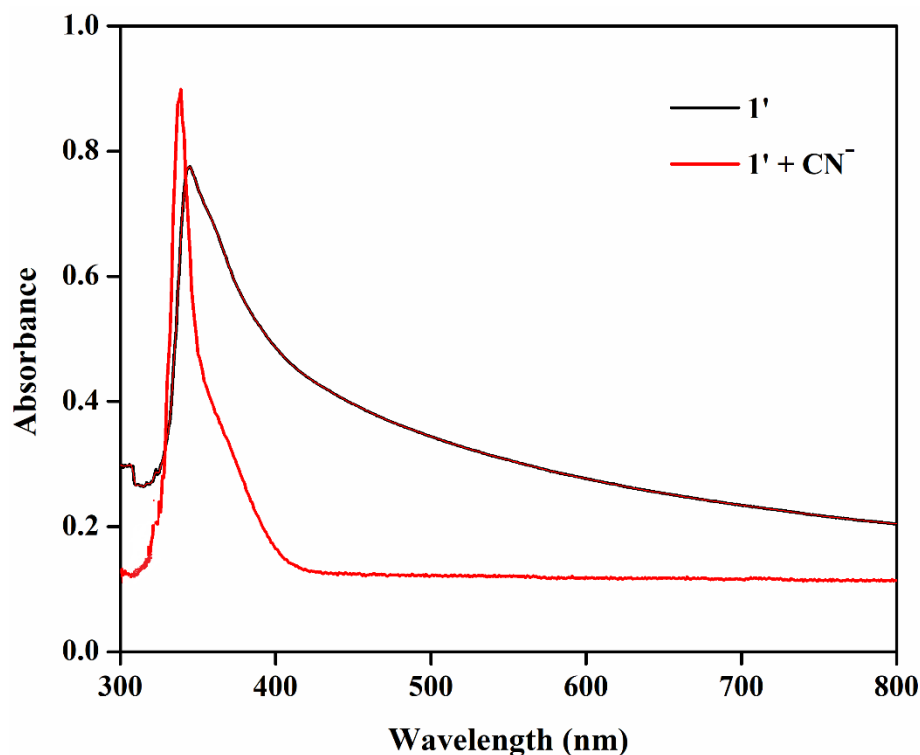

**Figure S27.** UV-Vis spectra of **1'** before and after addition of CN<sup>-</sup> solution (300 μL, 10 mM).

**Table S2.** Comparison of the solvent, response time, detection limit and fold increment of various existing MOF probes for the fluorescence detection of CN<sup>-</sup>.

| Sl. No. | Name of MOF                          | Medium Used | Response Time | Detection Limit | Fold Increment | Ref. |
|---------|--------------------------------------|-------------|---------------|-----------------|----------------|------|
| 1       | DUT-52-NH-COCF <sub>3</sub>          | water       | 2 min         | 0.23 μM         | 3              | 5    |
| 2       | CAU-10-N <sub>2</sub> H <sub>3</sub> | water       | 2 min         | 0.48 μM         | -              | 6    |
| 3       | carbazole-functionalized UiO-67      | water       | -             | 0.14 μM         | -              | 7    |



|    |                                                           |              |        |              |     |              |
|----|-----------------------------------------------------------|--------------|--------|--------------|-----|--------------|
| 4  | M-ZIF-90                                                  | DMSO/Water   | -      | 2 $\mu$ M    | -   | 8            |
| 5  | Bio-MOF-1 $\supset$<br>DAAC                               | HEPES buffer | -      | 5.2 ppb      | 17  | 9            |
| 6  | Tb-ADP-<br>Bipy                                           | water        | 10 sec | 30 nM        | 20  | 10           |
| 7  | NU-1000-BzTz                                              | Water        | -      | 1.08 $\mu$ M | -   | 11           |
| 8  | hemicyanine-<br>functionalized<br>mixed-ligand<br>PCN-700 | water        | 1 min  | 0.05 $\mu$ M | -   | 12           |
| 9  | P-1'                                                      | THF/Water    | 5 min  | 0.35 $\mu$ M | 14  | 13           |
| 10 | TIP-Co                                                    | THF-water    | 40 min | 89.3 nM      | -   | 14           |
| 11 | UiO-66-NH-<br>COCF <sub>3</sub> (1')                      | Water        | 1 min  | 0.28 $\mu$ M | 300 | this<br>work |

### Measurement of quantum yield:

The quantum is defined as the ratio of photon emitted and the ratio of photon absorbed. Here, we have calculated the quantum yield of cyanide treated **1'** by Parker-Rees method<sup>15</sup> using quinine sulphate as reference (0.5 M H<sub>2</sub>SO<sub>4</sub>). The formula for quantum yield calculation by Parker-Rees method is as follows.

$$\Phi_s = (A_r F_s n_s^2 / A_s n_r F_r^2) \Phi_r \quad (1)$$

where  $\Phi_r$  is the quantum yield of reference 0.5 M quinine sulphate solution and  $\Phi_s$  is the quantum yield of sample.  $A_r$  and  $A_s$  are the absorbance of reference and samples respectively.  $F_r$  and  $F_s$  are the integrated area of fluorescence intensity for reference and samples respectively and  $n_r$  and  $n_s$  are the refractive indices of reference and samples respectively. The quantum yield and the photophysical parameters are given below in Table S3.

**Table S3.** Photophysical parameters for UiO-66-NH-COCF<sub>3</sub> after treatment with cyanide solution for the calculation of quantum yield.

| Sl. No. | Sample Name                               | Excitation Wavelength $\lambda_{ex}$ (nm) | Absorbance (A) | Area of Integrated Fluorescence Intensity (F) | Quantum Yield ( $\phi$ ) |
|---------|-------------------------------------------|-------------------------------------------|----------------|-----------------------------------------------|--------------------------|
| 1       | Quinine Sulphate                          | 310                                       | 0.068          | 8.02 E +08                                    | 0.054                    |
| 2       | UiO-66-NH-COCF <sub>3</sub> (1')          | 320                                       | 0.105          | 5.41 E +06                                    | 0.002                    |
| 3       | 1'-after inclusion with cyanide solution. | 320                                       | 0.072          | 1 E +08                                       | 0.063                    |

#### References:

- Dalapati, R.; Nandi, S.; Gogoi, C.; Shome, A.; Biswas, S., Metal–organic framework (MOF) derived recyclable, superhydrophobic composite of cotton fabrics for the facile removal of oil spills. *ACS Appl. Mater. Interfaces* **2021**, *13*, 8563–8573.
- Boultif, A.; Louër, D., Indexing of powder diffraction patterns for low-symmetry lattices by the successive dichotomy method. *J. Appl. Crystallogr* **1991**, *24*, 987-993.
- STOE WinXPOW* version 2.11; Stoe & Cie GmbH: Darmstadt, Germany. **2005**.
- Jakobsen, S.; Gianolio, D.; Wragg, D. S.; Nilsen, M. H.; Emerich, H.; Bordiga, S.; Lamberti, C.; Olsbye, U.; Tilset, M.; Lillerud, K. P., Structural determination of a highly stable metal-organic framework with possible application to interim radioactive waste scavenging: Hf-UiO-66. *Phys. Rev. B* **2012**, *86*, 125429.
- Gogoi, C.; Nagarjun, N.; Roy, S.; SK, M.; Volkmer, D.; Dhakshinamoorthy, A.; Biswas, S., A Zr-based metal–organic framework with a DUT-52 structure containing a trifluoroacetamido-functionalized linker for aqueous phase fluorescence sensing of the cyanide ion and aerobic oxidation of cyclohexane. *Inorg. Chem.* **2021**, *60*, 4539–4550.
- Dalapati, R.; Nandi, S.; Reinsch, H.; Bhunia, B. K.; Mandal, B. B.; Stock, N.; Biswas, S., Fluorogenic naked-eye sensing and live-cell imaging of cyanide by a hydrazine-functionalized CAU-10 metal–organic framework. *CrystEngComm* **2018**, *20*, 4194-4201.
- Das, A.; Biswas, S., A multi-responsive carbazole-functionalized Zr(IV)-based metal-organic framework for selective sensing of Fe(III), cyanide and p-nitrophenol. *Sens. Actuators B Chem.* **2017**, *250*, 121-131.
- Karmakar, A.; Kumar, N.; Samanta, P.; Desai, A. V.; Ghosh, S. K., A post-synthetically modified MOF for selective and sensitive aqueous-phase detection of highly toxic cyanide ions. *Chem.--Eur. J.* **2015**, *22*, 864-868.
- Karmakar, A.; Joarder, B.; Mallick, A.; Samanta, P.; Desai, A. V.; Basua, S.; Ghosh, S. K., Aqueous phase sensing of cyanide ions using a hydrolytically stable metal–organic framework. *Chem. Commun.* **2017**, *53*, 1253-1256.
- Wang, L.; Wang, S.; Chen, Y., Detection of cyanide via extended  $\pi$ -conjugation-induced fluorescence enhancement of a metal organic framework composed of terbium(III), bipyridyl and adenosine diphosphate. *Microchimica Acta* **2017**, *184*, 4597-4602.

11. L, L.; Mercuri, G.; Islamoglu, T.; Fermi, A.; Bergamini, G.; Giambastiani, G.; Rossin, A., Benzothiazolium-functionalized NU-1000: a versatile material for carbon dioxide adsorption and cyanide luminescence sensing. *J. Mater. Chem. C* **2020**, *8*.
12. Li, J.; Yuan, S.; Qin, J.-S.; Pang, J.; Zhang, P.; Zhang, Y.; Huang, Y.; Drake, H. F.; Liu, W. R.; Zhou, H.-C., Stepwise assembly of turn-on fluorescence sensors in multicomponent metal–organic frameworks for in vitro cyanide detection. *Angew. Chem. Int. Ed.* **2020**, *59*, 9319-9323.
13. Dalapati, R.; Nandi, S.; Biswas, S., Post-synthetic modification of a metal–organic framework with a chemodosimeter for the rapid detection of lethal cyanide via dual emission. *Dalton Trans.* **2020**, *49*, 8684-8692.
14. Liu, Y.; Qiu, Q.; Zhang, X.; Huang, K.; Qin, D., Tetra-imidazole functionalized pyrene for constructing Co-MOF and Its application for sensing of cyanide ion. *J. Solid State Chem.* **2021**, *300*, 1222582.
15. Parker, C. A.; Rees, W. T., Correction of fluorescence spectra and measurement of fluorescence quantum efficiency. *Analyst* **1960**, *80*, 587-600.
